# Supplementary material for: Evaluation of the Solidification of Radioactive Wastes Using Blast Furnace Slag as a Solidifying Agent
Source: MDPI journal article supplement (doi:10.3390/ma16196462), 2023-09-28
Supplement: s1 [file s1]

## Supplementary Materials

**Table S1.** The standard for the self-disposal of radioactive wastes [8].

| Radioactive nuclide                                                                                                                                                                                                                                                                                                                                                                                                                                                                                                                                                                     | Radioactivity<br>(Bq/g) |
|-----------------------------------------------------------------------------------------------------------------------------------------------------------------------------------------------------------------------------------------------------------------------------------------------------------------------------------------------------------------------------------------------------------------------------------------------------------------------------------------------------------------------------------------------------------------------------------------|-------------------------|
| I-129                                                                                                                                                                                                                                                                                                                                                                                                                                                                                                                                                                                   | 0.01                    |
| Na-22, Sc-46, Mn-54, Co-56, Co-60, Zn-65, Nb-94, Ru-106, Ag-110m, Sb-125, Cs-134, Cs-137, Eu-152, Eu-154, Ta-182, Bi-207, Th-229, U-232, Pu-238, Pu-239, Pu-240, Pu-242, Pu-244, Am-241, Am-242m, Am-243, Cm-245, Cm-246, Cm-247, Cm-248, Cf-249, Cf-251, Es-254                                                                                                                                                                                                                                                                                                                        | 0.1                     |
| C-14, Na-24, Cl-36, Sc-48, V-48, Mn-52, Fe-59, Co-57, Co-58, Se-75, Br-82, Sr-85, Sr-90, Zr-95, Nb-95, Tc-96, Tc-99, Ru-103, Ag-105, Cd-109, Sn-113, Sb-124, Te-123m, Te-132, Cs-136, Ba-140, La-140, Ce-139, Eu-155, Tb-160, Hf-181, Os-185, Ir-190, Ir-192, Tl-204, Bi-206, U-233, Np-237, Pu-236, Cm-243, Cm-244, Cf-248, Cf-250, Cf-252, Cf-254                                                                                                                                                                                                                                     | 1                       |
| Be-7, F-18, Cl-38, K-43, Ca-47, Mn-51, Mn-52m, Mn-56, Fe-52, Co-55, Co-62m, Ni-65, Zn-69m, Ga-72, As-74, As-76, Sr-91, Sr-92, Zr-93, Zr-97, Nb-93m, Nb-97, Nb-98, Mo-90, Mo-93, Mo-99, Mo-101, Tc-97, Ru-97, Ru-105, Cd-115, In-111, In-114m, Sn-125, Sb-122, Te-127m, Te-129m, Te-131m, Te-133, Te-133m, Te-134, I-126, I-130, I-131, I-132, I-133, I-134, I-135, Cs-129, Cs-132, Cs-138, Ba-131, Ce-143, Ce-144, Gd-153, W-181, W-187, Pt-191, Au-198, Hg-203, Tl-200, Tl-202, Pb-203, Po-203, Po-205, Po-207, Ra-225, Pa-230, Pa-233, U-230b, U-236, Np-240, Pu-241, Cm-242, Es-254m | 10                      |
| H-3, S-35, K-42, Ca-45, Sc-47, Cr-51, Mn-53, Co-61, Ni-59, Ni-63, Cu-64, Rb-86, Sr-85m, Sr-87m, Y-91, Y-91m, Y-92, Y-93, Tc-97m, Tc-99m, Rh-105, Pd-109, Ag-111, Cd-115m, In-113m, In-115m, Te-129, Te-131, I-123, I-125, Cs-135, Ce-141, Pr-142, Nd-147, Nd-149, Sm-153, Eu-152m, Gd-159, Dy-166, Ho-166, Er-171, Tm-170, Yb-175, Lu-177, Re-188, Os-191, Os-193, Ir-194, Pt-197m, Au-199, Hg-197, Hg-197m, Tl-201, Ra-227, U-231, U-237, U-239, U-240, Np-239, Pu-234, Pu-235, Pu-237, Bk-249, Cf-253, Es-253, Fm-255                                                                 | 100                     |

**Table S1. Continued.**

| Radioactive nuclide                                                                                                                                                                                                                                                      | Radioactivity<br>(Bq/g) |
|--------------------------------------------------------------------------------------------------------------------------------------------------------------------------------------------------------------------------------------------------------------------------|-------------------------|
| Si-31, P-32, P-33, Fe-55, Co-60m, Zn-69, As-73, As-77, Sr-89, Y-90, Tc-96m,<br>Pd-103, Te-125m, Te-127, Cs-131, Cs-134m, Pr-143, Pm-147, Pm-149, Sm-<br>151, Dy-165, Er-169, Tm-171, W-185, Re-186, Os-191m, Pt-193m, Pt-197, At-<br>211, Th-226, Pu-243, Am-242, Cf-246 | 1,000                   |
| Co-58m, Ge-71, Rh-103m, Fm-254                                                                                                                                                                                                                                           | 10,000                  |

Footnote 1: For the wastes including multiple radioactive nuclides, the criteria for their radioactivity levels are calculated as follows:

$$\sum_i \frac{C_i}{C_{Li}} < 1$$

Where  $C_i$  is the radioactivity of the  $i$ th radionuclide and  $C_{Li}$  is the radioactivity for the self-disposal of the  $i$ th radionuclide, given in Table S2,

Footnote 2: For the radioactive nuclides excluded from Table S2, their self-disposal criteria are 0.1 Bq/g.

**Table S2.** The standard for the radioactivity of low-level radioactive wastes [8].

| Radioactive nuclide | Radioactivity (Bq/g) |
|---------------------|----------------------|
| H-3                 | 1.11E+6              |
| C-14                | 2.22E+5              |
| Co-60               | 3.70E+7              |
| Ni-59               | 7.40E+4              |
| Ni-63               | 1.11E+7              |
| Sr-90               | 7.40E+4              |
| Nb-94               | 1.11E+2              |
| Tc-99               | 1.11E+3              |
| I-129               | 3.70E+1              |
| Cs-137              | 1.11E+6              |
| Total alpha         | 3.70E+3              |
